# Supplementary material
Source: publisher figshare collection journal article supplement (https://adisjournals.figshare.com/ndownloader/files/10821905)
Supplement: Supplementary file 1 [file 10821905]

## REGAL: RSV Evidence — a Geographical Archive of the Literature

### Objectives and Methodology

Louis Bont • Paul A. Checchia • Brigitte Fauroux • Josep Figueras-Aloy •  
Paolo Manzoni • Bosco Paes • Eric A. F. Simões • Xavier Carbonell-Estrany

Infect Dis Ther.

This slide deck represents the opinions of the authors. Sponsorship for this project was funded by AbbVie. Medical writing assistance for this study was provided by Strategen Limited. For a full list of acknowledgments and conflicts of interest for all authors of this article, please see the full text online. Copyright © The Authors 2017. Creative Commons Attribution Noncommercial License (CC BY-NC).

## Abbreviations

- BPD: Bronchopulmonary dysplasia
- CHD: Congenital heart disease
- CLD: Chronic lung disease
- ICU: Intensive care unit
- LOS: Length of stay
- MV: Mechanical ventilation
- RCT: Randomized controlled trial
- RSV: Respiratory syncytial virus
- RSVH: Respiratory syncytial virus hospitalization
- RTI: Research Triangle Institute
- SOE: Strength of Evidence
- wGA: weeks' gestational age

## REGAL: RSV Evidence — a Geographical Archive of the Literature

- Understanding the incidence and complications of RSV disease is essential:
  - Planning strategies to control RSV infection
  - Optimize the use of RSV prophylaxis and future RSV vaccines
- Primary objective:
  - To carry out a series of systematic literature reviews
  - To assess, quantify, summarize and grade the evidence base
- Outcome:
  - Defined the current state of the art in our understanding of RSV
  - Identified gaps in our knowledge and future areas of research

## REGAL: Expert Panel

Neonatologists, Pediatricians, Pediatric Infectious Disease Specialists, Pediatric Cardiologists, and Pediatric Pulmonologists:

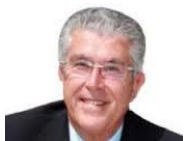

**Xavier Carbonell-Estrany**  
*Hospital Clinic, Institut  
d'Investigacions Biomediques August  
Pi Suñer (IDIBAPS), Barcelona, Spain*

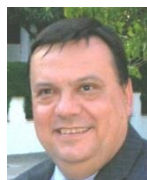

**Josep Figueras-Aloy**  
*Hospital Clínic, Catedràtic de  
Pediatría, Universitat de Barcelona,  
Barcelona, Spain*

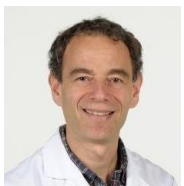

**Louis Bont**  
*University Medical Center Utrecht,  
Utrecht, The Netherlands*

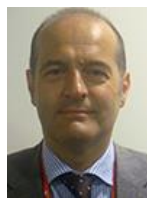

**Paolo Manzoni**  
*Neonatology and NICU, Sant'Anna  
Hospital, Turin, Italy*

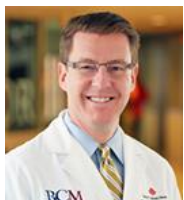

**Paul A. Checchia**  
*Baylor College of Medicine, Texas  
Children's Hospital Houston, Texas,  
USA*

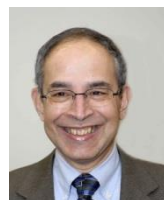

**Bosco Paes**  
*Department of Pediatrics (Neonatal  
Division), McMaster University,  
Hamilton, ON, Canada*

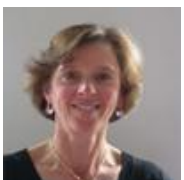

**Brigitte Fauroux**  
*Necker University Hospital and Paris  
5 University, Paris, France*

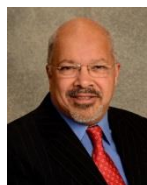

**Eric A. F. Simões**  
*Colorado School of Public Health,  
University of Colorado School of  
Medicine, Aurora, CO, USA*

## REGAL: Study Questions

Seven specific research questions were addressed:

1. What is the overall epidemiology and disease burden of severe RSV infection in Western countries, and what are the associated risk factors for RSVH?<sup>1</sup>
2. What is the predisposition and associated morbidity, long-term sequelae and mortality of preterm infants (<37 wGA) without CLD/BPD or CHD, overall, and split by gestational age segments, to severe RSV infection, and what are the risk factors associated with RSVH?<sup>2</sup>
3. What is the predisposition and associated morbidity, long-term sequelae and mortality of infants with underlying CLD/BPD to severe RSV infection in Western countries?<sup>3</sup>
4. What is the predisposition and associated morbidity, long-term sequelae and mortality of infants with underlying CHD to severe RSV infection in Western countries?<sup>4</sup>
5. What is the nature, incidence and impact of long-term respiratory morbidity associated with RSVH in infancy in Western countries, specifically early and late wheeze?<sup>5</sup>
6. What other groups of infants with underlying medical conditions or chronic diseases are at high risk of RSVH and associated morbidity?<sup>6</sup>
7. What are the optimal approaches and strategies for the prevention and treatment of severe RSV infection and what are the future perspectives in this regard?<sup>7</sup>

## REGAL: Overall Methodology

- **Systematic review:** MEDLINE (PubMed), Embase, The Cochrane Library, and Clinicaltrials.gov
- **Time and Place of study:**
  - Western countries: The United States, Canada, and Europe (including Turkey and the Russian Federation)
  - Published between Jan 1, 1995 and Dec 31, 2015
- **Age:**  $\leq 18$  years
- **Additional search:** hand-searching of online journals and reference lists of identified citations and relevant meeting abstracts
- **Type of study:** RCTs, non-RCTs, crossover trials, single-arm studies, cohort studies, case-control studies, case series, registries, and medical databases

## REGAL: Definition of severe RSV infection and Outcomes

- Severe RSV infection defined as: ‘RSV infection requiring hospitalization’

| Short-term outcomes                                                                                                                                                                                                                                                                                                                                                                                                                                                                                                       | Long-term & other outcomes                                                                                                                                                                                                                                                                                                                                                                                                                                      |
|---------------------------------------------------------------------------------------------------------------------------------------------------------------------------------------------------------------------------------------------------------------------------------------------------------------------------------------------------------------------------------------------------------------------------------------------------------------------------------------------------------------------------|-----------------------------------------------------------------------------------------------------------------------------------------------------------------------------------------------------------------------------------------------------------------------------------------------------------------------------------------------------------------------------------------------------------------------------------------------------------------|
| <ul style="list-style-type: none"><li>• Incidence rates of severe RSV infection requiring medical treatment during the first or subsequent years of life</li><li>• RSVH rates</li><li>• LOS in hospital</li><li>• RSVH-related outcomes<ul style="list-style-type: none"><li>○ ICU admission, LOS in ICU, requirement for, and duration of, MV, non-invasive ventilation, oxygen</li></ul></li><li>• Case-fatality rate</li><li>• Risk factors for RSVH</li><li>• Effectiveness of palivizumab in reducing RSVH</li></ul> | <ul style="list-style-type: none"><li>• Subsequent respiratory disease, including recurrent wheezing and asthma up to adulthood (<math>\leq 18</math> years) following RSVH in infancy</li><li>• Effectiveness of palivizumab in reducing recurrent wheeze/asthma</li><li>• Rates and associated morbidity, long-term sequelae and mortality in different subgroups of children with or without CLD/BPD</li><li>• Future developments in RSV research</li></ul> |

## REGAL: Data Synthesis

- Included publications were graded according to the Oxford Centre for Evidence-Based Medicine Levels of Evidence

| Level | Definition                                                                                                                |
|-------|---------------------------------------------------------------------------------------------------------------------------|
| 1     | <ul style="list-style-type: none"><li>• Local and current random sample surveys or censuses</li></ul>                     |
| 2     | <ul style="list-style-type: none"><li>• Systematic review of surveys that allow matching to local circumstances</li></ul> |
| 3     | <ul style="list-style-type: none"><li>• Local non-random sample</li></ul>                                                 |
| 4     | <ul style="list-style-type: none"><li>• Case series</li></ul>                                                             |

- For RCTs, a quality assessment for each citation was carried out using the five-point (1 = low quality; 5 = high quality) Jadad Scale
- For each study, a risk of bias assessment was undertaken:
  - Observational studies: RTI Item Bank (score of 1 = very high risk of bias; score of 12 = very low risk of bias)
  - RCTs: Cochrane Collaboration's tool for assessing risk of bias



## Acknowledgments

- Dr Joanne Smith, Julie Blake and Dr Barry Rodgers-Gray from Strategen Limited undertook the systematic review following the protocol approved by the authors and were funded by AbbVie.
- All named authors meet the International Committee of Medical Journal Editors (ICMJE) criteria for authorship for this manuscript, take responsibility for the integrity of the work as a whole, and have given final approval to the version to be published.
- Editorial assistance in the preparation of this manuscript was provided by Julie Blake and Dr Barry Rodgers-Gray. They developed a first draft of the manuscript, based on the results of the systematic review and input/approval from all authors, which was initially edited by X. Carbonell-Estrany and L. Bont and then circulated among the other authors for input, further edits and subsequent approval. Support for this assistance was funded by AbbVie.
- AbbVie had the opportunity to review and comment on the completed manuscript but final editorial control rested fully with the authors.
- Article processing charges for this study were funded by Abbvie.

## Disclosures

The institute of L. Bont received money for investigator initiated studies by MeMed, Astra Zeneca, AbbVie, and Janssen. The institute of L. Bont received money for consultancy by Astra Zeneca, AbbVie, MedImmune, Janssen, Gilead and Novavax. P. Checchia has acted as an expert advisor and speaker for AbbVie and has received honoraria in this regard. He has also received research Grant funding from AstroZeneca. B. Fauroux has received compensation as a neonatology board member from Abbvie. J. Figueras-Aloy has acted as an expert advisor and speaker for AbbVie and has received honoraria in this regard. P. Manzoni has acted as a speaker for AbbVie, and as an expert advisor for AbbVie, TEVA, MedImmune, AstraZeneca, Janssen, and has received honoraria in this regard. B. Paes has received research funding from AbbVie Corporation and compensation as an advisor or lecturer from AbbVie and MedImmune. E.A.F Simões has received Grant funding to his institution from MedImmune Inc, Glaxo Smith Kline Inc, and received consultancy fees to the institution, from Abbvie. X. Carbonell-Estrany has acted as an expert advisor and speaker for AbbVie and has received honoraria in this regard.

## Copyright

Copyright © The Authors 2017.

This slide deck is distributed under the terms of the Creative Commons Attribution Noncommercial License which permits any noncommercial use, distribution, and reproduction in any medium, provided the original author(s) and the source are credited.
